# Supplementary material for: Influence of Coating and Size of Magnetic Nanoparticles on Cellular Uptake for In Vitro MRI
Source: MDPI journal article supplement (doi:10.3390/nano11112888), 2021-10-28
Supplement: s1 [file s1]

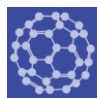

# Influence of Coating and Size of Magnetic Nanoparticles on Cellular Uptake for In Vitro MRI

Belén Cortés-Llanos <sup>1,2,3</sup>, Sandra M. Ocampo <sup>1</sup>, Leonor de la Cueva <sup>1</sup>, Gabriel F. Calvo <sup>4</sup>, Juan Belmonte-Beita <sup>4</sup>, Lucas Pérez <sup>1,3</sup>, Gorka Salas <sup>1,\*</sup>, Ángel Ayuso-Sacido <sup>5,6,7,\*</sup>

<sup>1</sup> IMDEA Nanoscience, Ciudad Universitaria de Cantoblanco, 28049 Madrid, Spain; belencortes@ucm.es (B.C.-L.); samioca75@gmail.com (S.M.O.); ldelacueva@euro-funding.com (L.d.l.C.); lucas.perez@ucm.es (L.P.)

<sup>2</sup> Department of Bioengineering, University of Washington, Seattle, WA 98195, USA

<sup>3</sup> Department of Materials Physics, Complutense University of Madrid, 28040 Madrid, Spain

<sup>4</sup> MOLAB-Mathematical Oncology Laboratory, Department of Mathematics, Universidad de Castilla-La Mancha, 13071 Ciudad Real, Spain; gabriel.fernandez@uclm.es (G.F.C.) and juan.belmonte@uclm.es (J.B.-B.)

<sup>5</sup> Brain Tumor Laboratory, Fundación Vithas, Grupo Hospitales Vithas, 28043 Madrid, Spain

<sup>6</sup> Faculty of Experimental Sciences, Universidad Francisco de Vitoria, 28223 Madrid, Spain

<sup>7</sup> Faculty of Medicine, Universidad Francisco de Vitoria, 28223 Madrid, Spain

\* Correspondence: gorka.salas@imdea.org (G.S.); ayusosacido@gmail.com (A.A.-S.); Tel.: +34-912-998-850 (G.S.); +34-686-966-904 (A.A.-S.)

## IONPs characterization

### *XRD and VSM measurements*

The diffraction maxima (Figure S1D) have been indexed as 220, 311, 400, 422, 511 and 440 reflections corresponding all of them to the maghemite phase (ICDD 00-039-1346). Almost identical  $M_s$  values in the range 74–79 emu/g, typical of maghemite, were measured for all samples (Figure S1E).

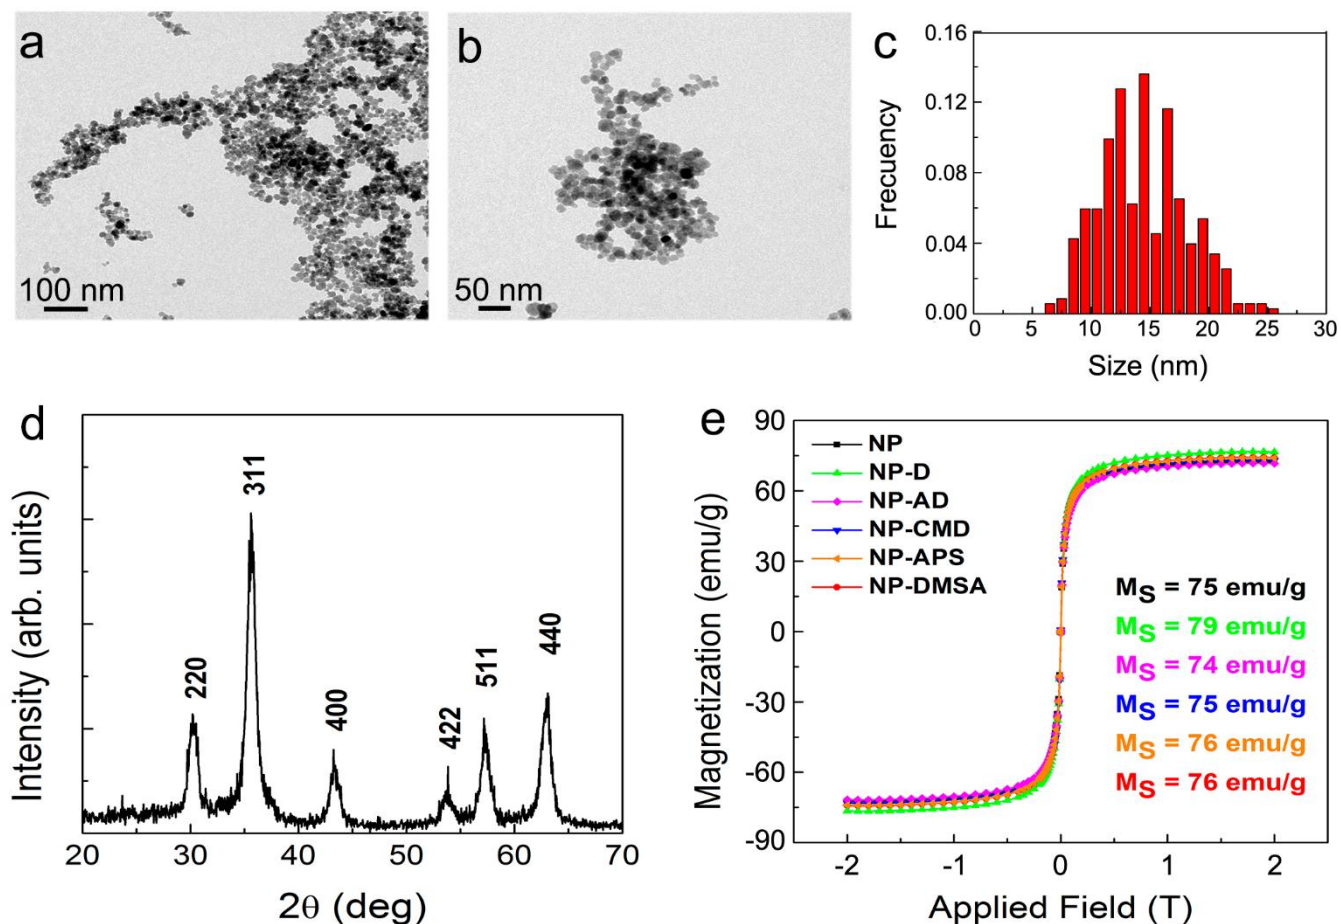

**Figure S1.** a–c) Selected TEM micrographs and histogram showing the size distribution of IONPs. d) XRD pattern and diffraction maxima from maghemite nanoparticles. e) VSM measurements for the different coated IONPs. Key words: NP (naked), NP-D (dextran), NP-AD (amino-dextran), NP-CMD (carboxymethyl-dextran), NP-APS (aminopropyl-trietoxy silane), and NP-DMSA (dimercaptosuccinic acid).

## IONPs uptake by the CMI method

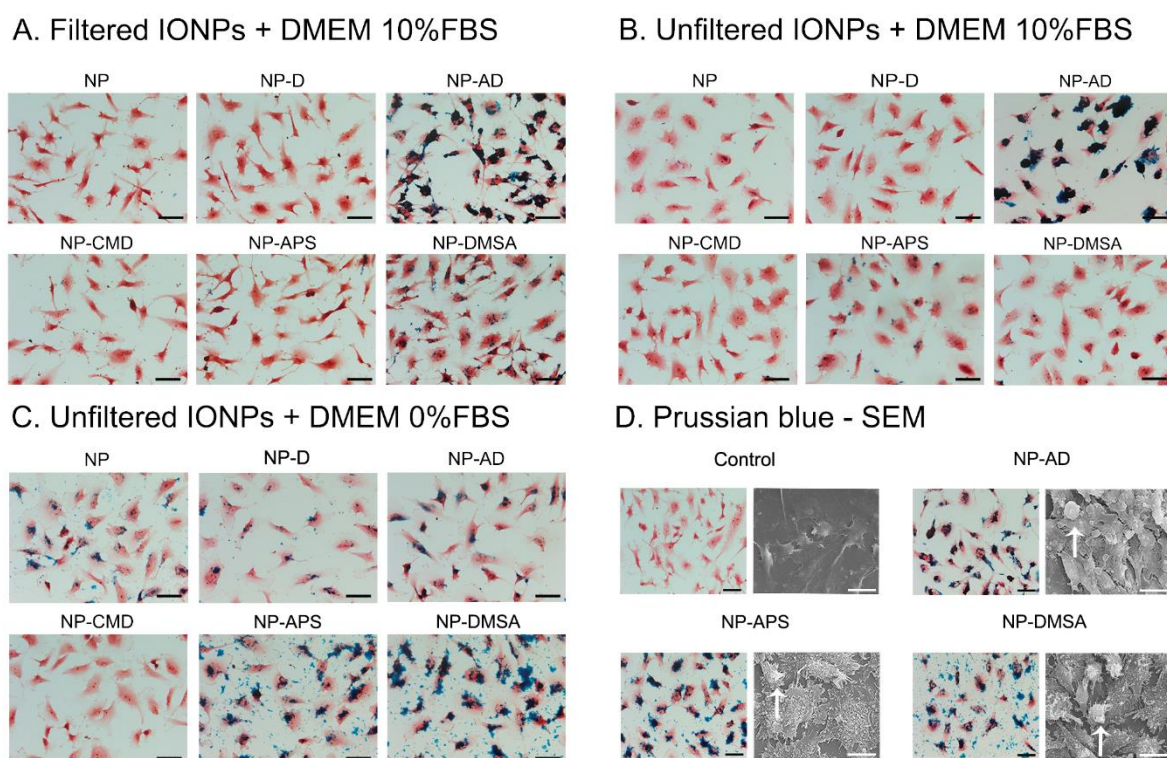

**Figure S2.** Optical microscopy images of U373 cells after Prussian blue staining following **A)** Filtered IONPs suspended in DMEM with 10% FBS, **B)** Un-filtered IONPs suspended in DMEM with 10% of FBS, **C)** Un-filtered IONPs in DMEM at 0% of FBS. **D)** Scanning electron microscopy of a control U373 cells, filtered NP-AD on DMEM 10% FBS, un-filtered NP-APS and NP-DMS on DMEM 0% FBS. White arrows show IONPs on the cell membrane surface. Scale bars: black = 50  $\mu\text{m}$ , white = 25  $\mu\text{m}$ .

## Colloidal properties

**Table S1.** Colloidal properties of IONPs Table 1, after CMI improvements.

| IONPs   | $D_{hyd}$ (nm) | $\zeta$ potential (mV) | Labelling (%)  |
|---------|----------------|------------------------|----------------|
| NP      | 1347 (0.3)     | -8                     | 97.6 $\pm$ 8.8 |
| NP-D    | 132 (0.3)      | -4                     | 81.6 $\pm$ 5.7 |
| NP-AD   | 76 (0.3)       | 10                     | 97.3 $\pm$ 2.9 |
| NP-CMD  | 84 (0.1)       | -18                    | 2.5 $\pm$ 0.4  |
| NP-APS  | 177 (0.2)      | -1                     | 79.5 $\pm$ 7.4 |
| NP-DMSA | 335 (0.3)      | -12                    | 98.7 $\pm$ 1.2 |

**Table S2.** Mean hydrodynamic diameters (with PDI in parentheses) and zeta potential values of IONPs with different size core suspended in water, DMEM cell culture medium and DMEM supplemented with FBS (10%).

| IONPs  | $D_{hyd}$ (nm) |            |             | $\zeta$ potential (mV) |      |             |
|--------|----------------|------------|-------------|------------------------|------|-------------|
|        | Water          | DMEM       | DMEM+10%FBS | Water                  | DMEM | DMEM+10%FBS |
| IONP7  | 53 (0.1)       | 958 (0.3)  | 376 (0.3)   | -43                    | -15  | -11         |
| IONP12 | 78 (0.3)       | 1014 (0.2) | 357 (0.3)   | -41                    | -10  | -12         |
| IONP14 | 49 (0.4)       | 1002 (0.7) | 212 (0.3)   | -37                    | -22  | -12         |
| IONP18 | 44 (0.2)       | 820 (0.2)  | 223 (0.4)   | -37                    | -22  | -12         |
| IONP23 | 45 (0.2)       | 1946 (0.2) | 424 (0.4)   | -43                    | -16  | -12         |
| IONP33 | 85 (0.3)       | 834 (0.3)  | 350 (0.3)   | -42                    | -14  | -11         |

Figure S3 shows the optical images after Prussian blue staining at different initial IONP23 concentrations. With high initial concentrations of 100 and 125  $\mu\text{g/mL}$ , agglomerates appeared on the cell surface, so 25, 50 and 75  $\mu\text{g/mL}$  of initial concentration were used to favour internalization.

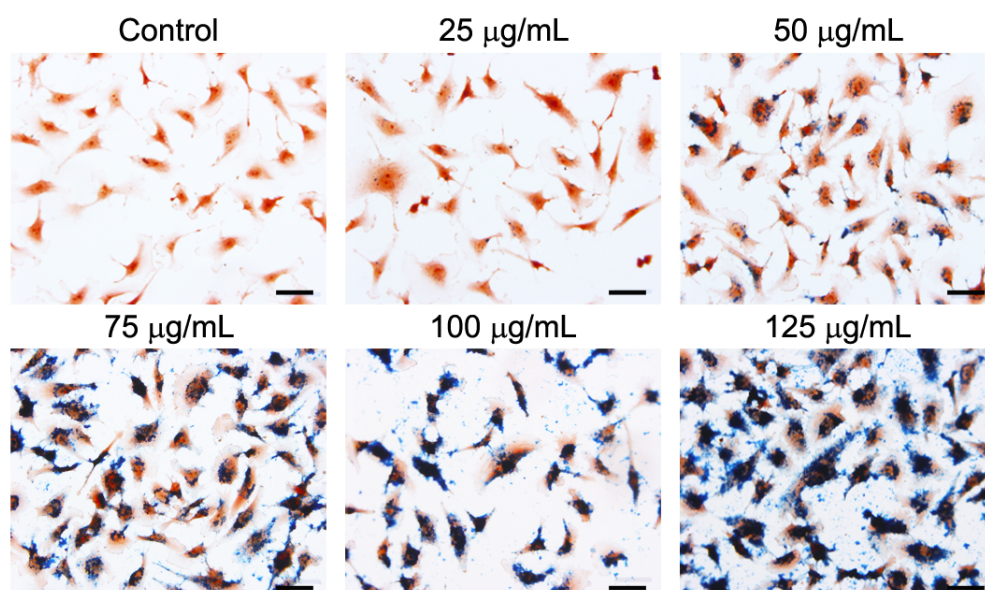

**Figure S3.** Prussian blue optical images of IONP23 on U373 cells at different concentrations, 25, 50, 75, 100 and 125  $\mu\text{g/mL}$ . Scale bar: 50  $\mu\text{m}$ .



## MRI Contrast Enhancement In Vitro

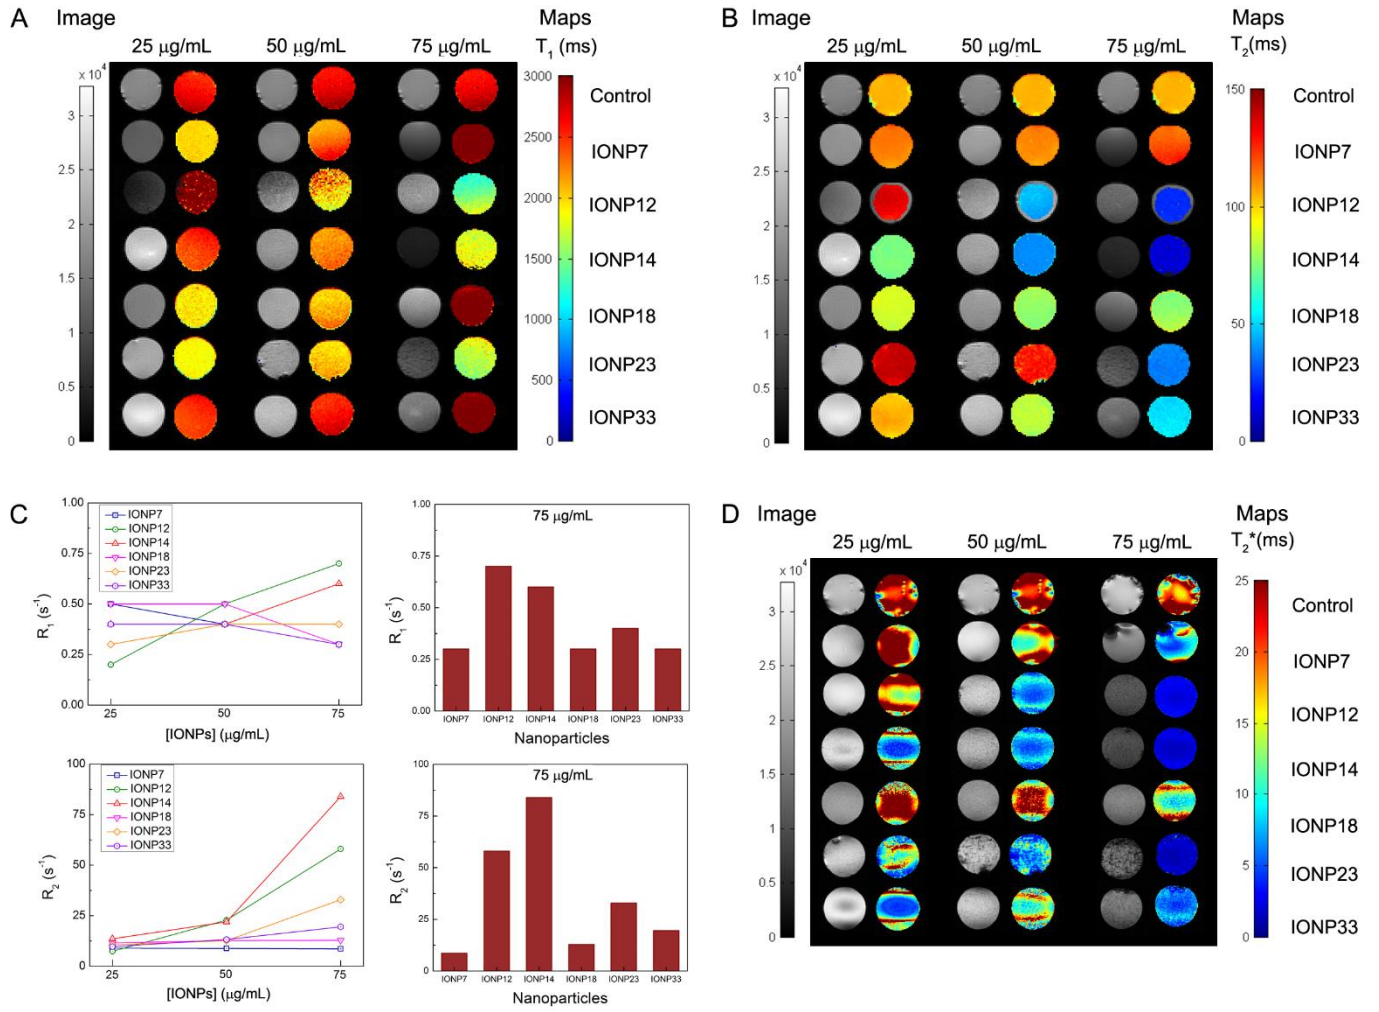

**Figure S4.** Contrast images and maps of **A)**  $T_1$ , **B)**  $T_2$  at an initial concentration of 25  $\mu\text{g/mL}$ , 50  $\mu\text{g/mL}$  and 75  $\mu\text{g/mL}$  for all IONPs. **C,** left)  $R_1$  (up) and  $R_2$  (down) values for all IONPs at different concentrations. **C,** right) Values of  $R_1$  (up) and  $R_2$  (down) using 75  $\mu\text{g/mL}$  for all IONPs. **D)** Contrast and maps of  $T_2^*$  of all IONPs using 25  $\mu\text{g/mL}$ , 50  $\mu\text{g/mL}$  and 75  $\mu\text{g/mL}$  initial concentrations.
